# Supplementary material
Source: Springer Nature journal article supplement (https://www.springerprofessional.de/resource/supplementary/40095_2012_52_MOESM9_ESM.pdf/11899726)

# Moisture loss(5) vs Time (Hrs) for Grapes

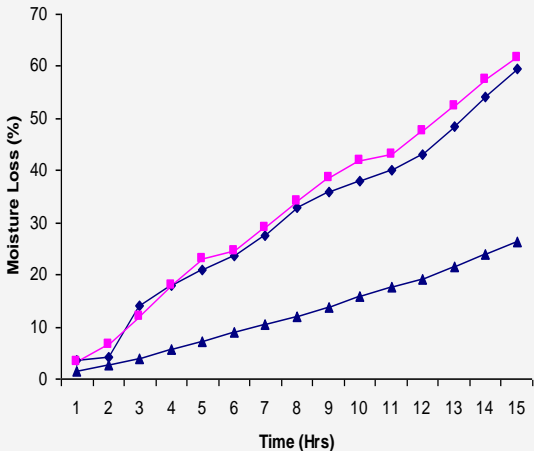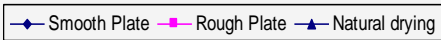

Supplement: MOESM9 [file 11899726]
